# Supplementary material for: A new bioluminescent reporter system to study the biodistribution of systematically injected tumor-derived bioluminescent extracellular vesicles in mice
Source: PubMed Central journal article supplement (PMC5746352; doi:10.18632/oncotarget.22493), 2017-11-18
Supplement: oncotarget-08-109894-s001.pdf [file oncotarget-08-109894-s001.pdf]

# A new bioluminescent reporter system to study the biodistribution of systematically injected tumor-derived bioluminescent extracellular vesicles in mice

## SUPPLEMENTARY MATERIALS

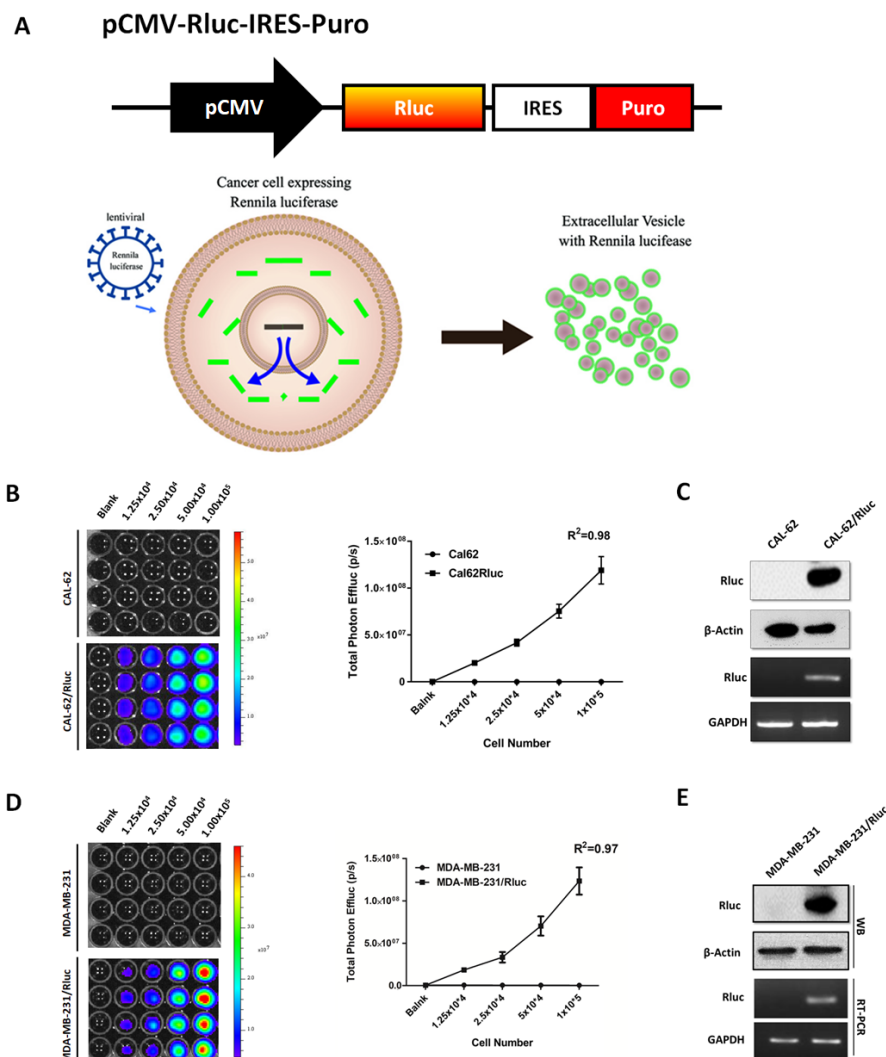

**Supplementary Figure 1: Generation of stable reporter gene expression in the cancer cell line.** (A) A diagrammatic representation of plasmid constructs, transfection and EV expressing Rluc. (B) Representative bioluminescent imaging of the *in vitro* luciferase assay in CAL-62 and CAL-62/Rluc cells. An *in vitro* luciferase assay in CAL-62 and CAL-62/Rluc cells. Data are expressed as mean  $\pm$  standard deviation (SD). (C) Western blot analysis of the Rluc (37 kDa) protein in CAL-62/Rluc and CAL-62 cells;  $\beta$ -actin was used as an internal control. RT-PCR analysis to determine the expression of the *Rluc* gene in CAL-62/Rluc cells and CAL-62 cells; GAPDH served as an internal control. (D) Representative bioluminescent imaging of the *in vitro* luciferase assay in MDA-MB-231 and MDA-MB-231/Rluc cells. An *in vitro* luciferase assay in MDA-MB-231 and MDA-MB-231/Rluc cells. Data are expressed as mean  $\pm$  standard deviation (SD). (E) Western blot analysis of the Rluc (37 kDa) protein in MDA-MB-231/Rluc and MDA-MB-231 cells;  $\beta$ -actin was used as an internal control. RT-PCR analysis to determine the expression of the *Rluc* gene in MDA-MB-231/Rluc cells and MDA-MB-231 cells; GAPDH served as an internal control.

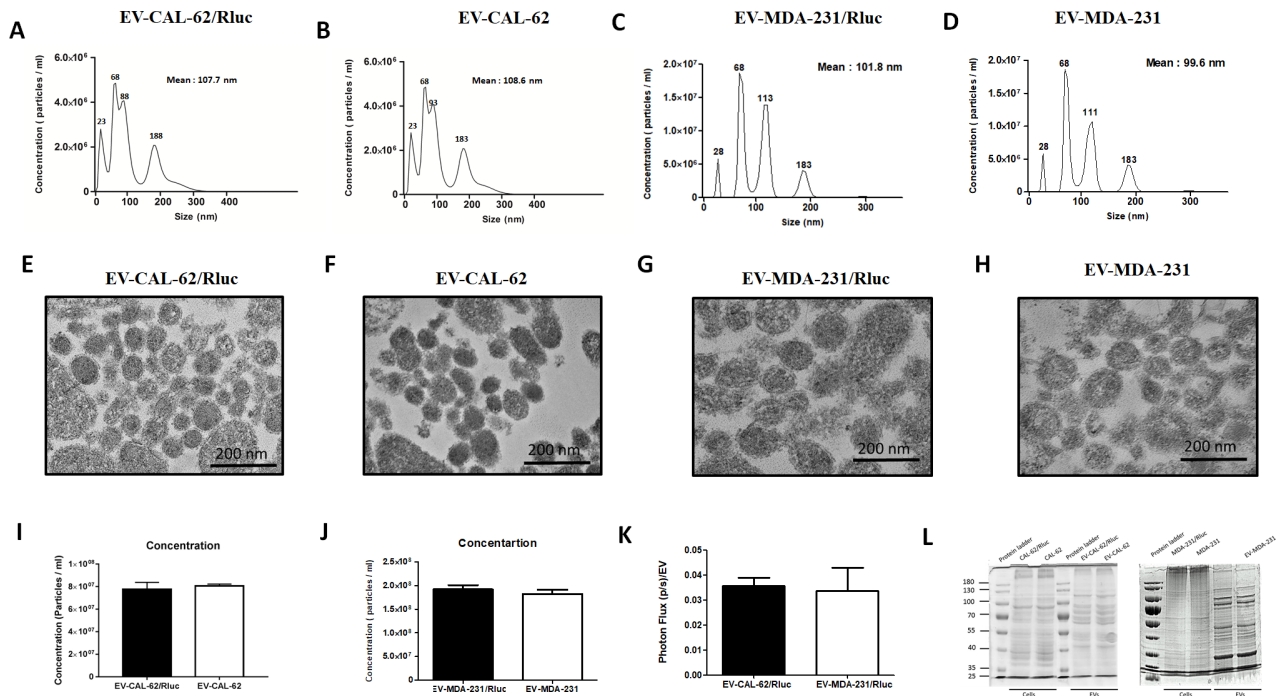

**Supplementary Figure 2 : EV size and structure are not affected by Rluc manipulations in cells.** (A–D) Size of EVs derived from by CAL-62/Rluc, CAL-62 cells, MDA-MB-231/Rluc and MDA-MB-231 as measured by NanoSight. (E–H) Electron-microscopic examination of EVs from CAL-62/Rluc, CAL-62 cells, MDA-MB-231/Rluc and MDA-MB-231. (I, J) Concentration of EVs from CAL-62/Rluc, CAL-62 cells, MDA-MB-231/Rluc and MDA-MB-231 were measured. Sizes of EVs did not differ significantly (CAL-62:  $P = 0.22$  and MDA-MB-231:  $P = 0.42$ ). The concentration is expressed as the number of particles per milliliter. Data are expressed as mean  $\pm$  SD. (K) The Rluc expression (Photon Flux) in a single EVs of CAL-62/Rluc and MDA-MB-231/Rluc are expressed as mean  $\pm$  SD. (L) Detection of EV proteins derived from the CAL-62/Rluc, CAL-62 MDA-231/Rluc and MDA-231 cells and their respective EVs by Coomassie brilliant blue (CBB) staining.

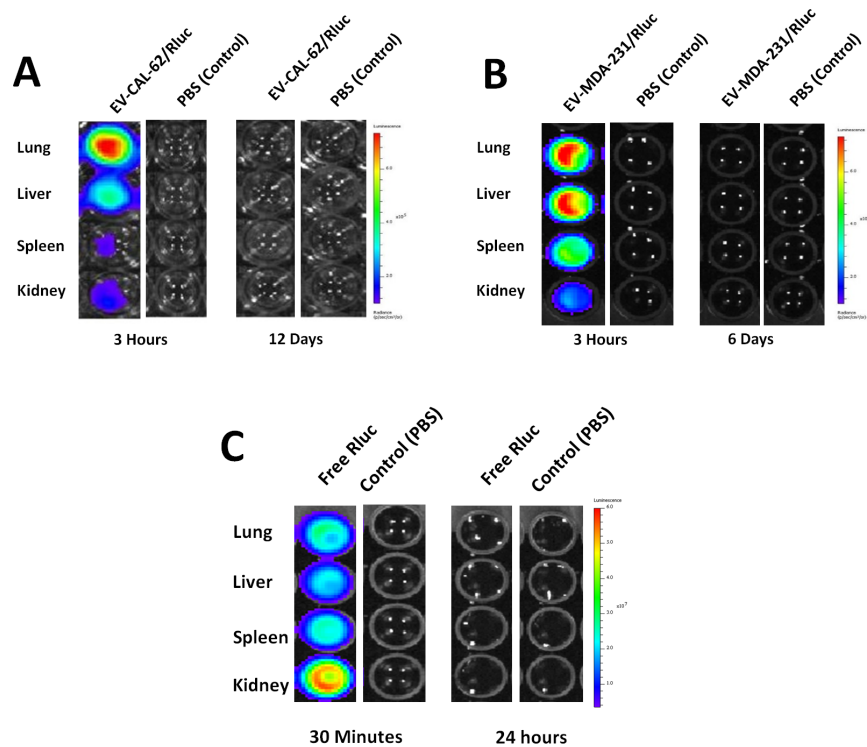

**Supplementary Figure 3: Biodistribution of i.v. administered EV-CAL-62/Rluc, EV-MDA-231/Rluc and free Rluc in organs.** (A) Representative *in vivo* bioluminescent imaging (BLI) of dissected organs of mice injected with EV-CAL-62/Rluc ( $n = 3$ ) or PBS ( $n = 3$ ); the mice were euthanized at 3 hours and 12 days after injection. (B) Representative *in vivo* bioluminescent imaging (BLI) of dissected organs of mice injected with EV-MDA-231/Rluc ( $n = 3$ ) or PBS ( $n = 3$ ); the mice were euthanized at 3 hours and 6 days after injection. (C) Representative *in vivo* bioluminescent imaging (BLI) of dissected organs of mice injected with Free Rluc ( $n = 3$ ) or PBS ( $n = 3$ ); the mice were euthanized at 30 minutes hours and 24 hours after injection.

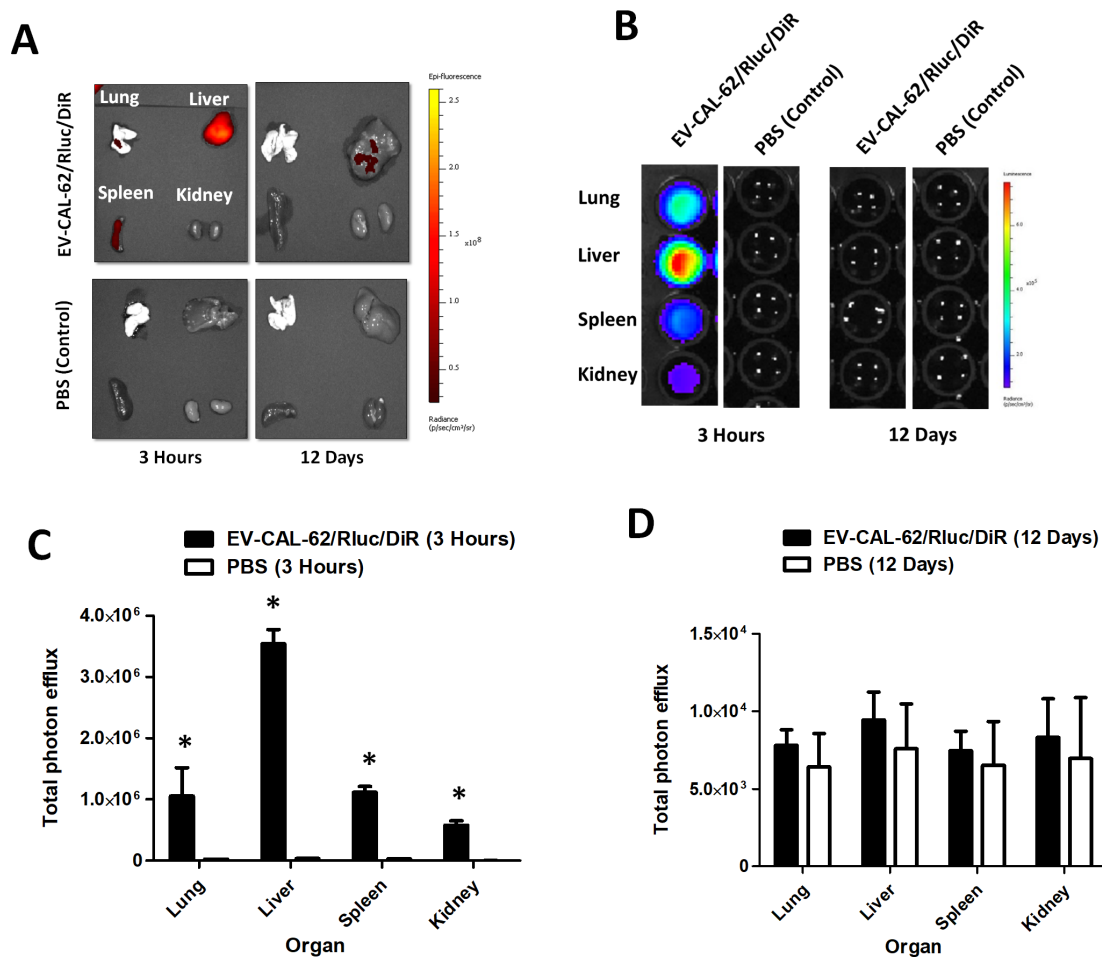

**Supplementary Figure 4: Biodistribution of i.v. administered EV-CAL-62/Rluc/DiR in organs.** (A, B) Representative in vivo fluorescent imaging (FLI) and bioluminescent imaging (BLI) of dissected organs of mice injected with EV-CAL-62/Rluc/DiR ( $n = 3$ ) or PBS ( $n = 3$ ) mice were euthanized at 3 hours and 12 days after injection. (C, D) Bioluminescence quantification of lungs, liver, spleen, and kidneys at 3 hours and 12 days (EV-CAL-62/Rluc or PBS); the values are expressed as mean  $\pm$  SD,  $*P < 0.05$ , (Student's  $t$ -test).

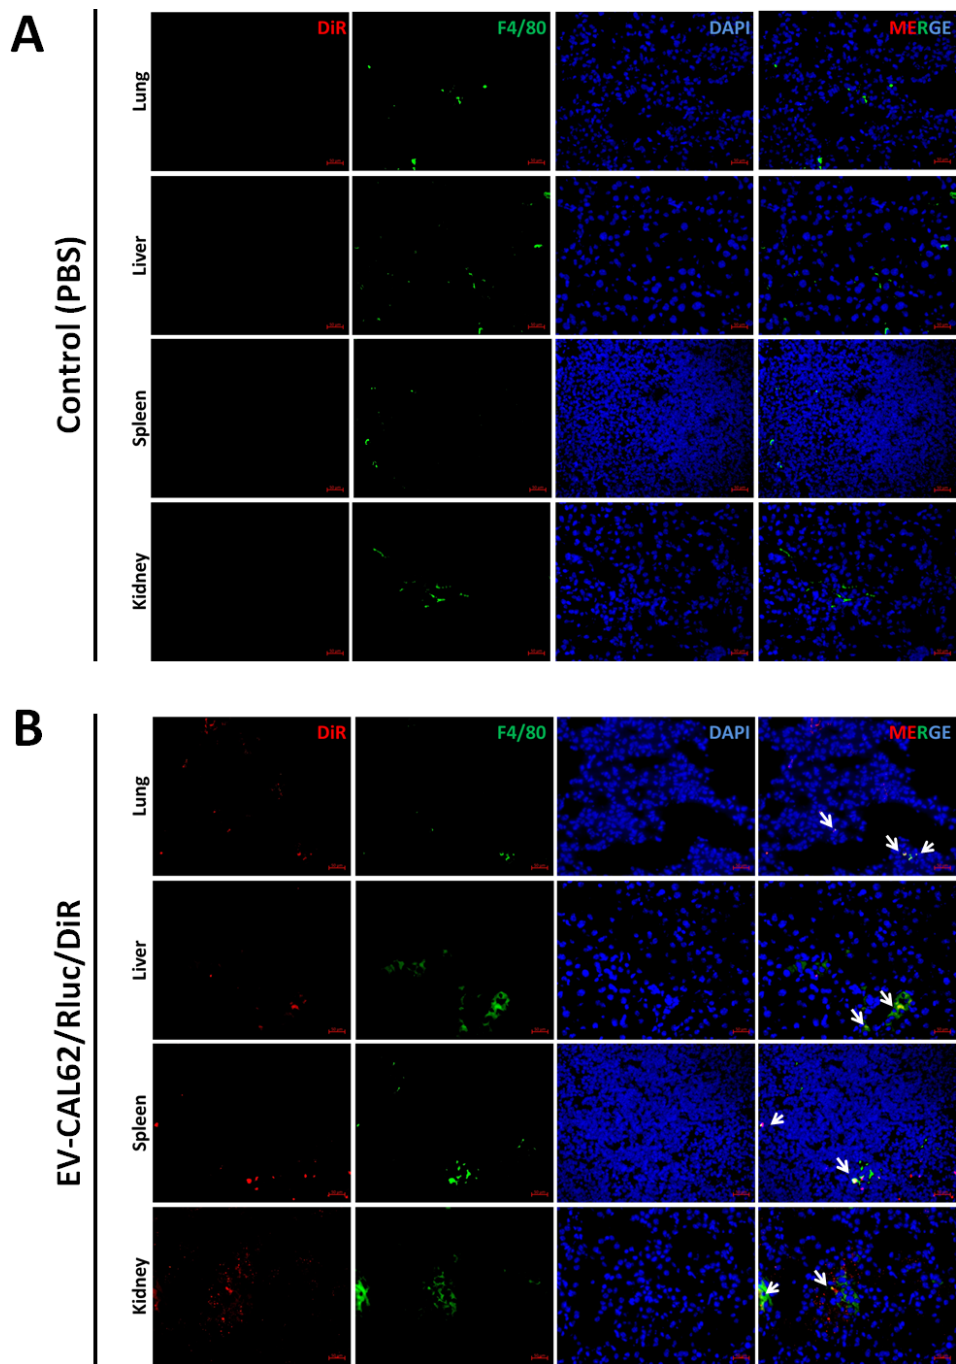

**Supplementary Figure 5: Subcellular visualization of i.v. administered EV-CAL-62/Rluc/DiR in organ.** (A, B) Mice injected with EV-CAL-62/Rluc/DiR ( $n = 3$ ) or PBS ( $n = 3$ ) mice were euthanized at 3 hours after injection. Cryo-sectioned and immunostained with anti-F4/80 (rabbit) and Alexa Fluor 488 goat anti-rabbit antibodies. EV-CAL-62/Rluc/DiR (arrow) was co-localized with macrophages cells in organs. Nuclei were visualized by 4,6-diamidino-2-phenylindole (DAPI). Bar, 50  $\mu$ m.

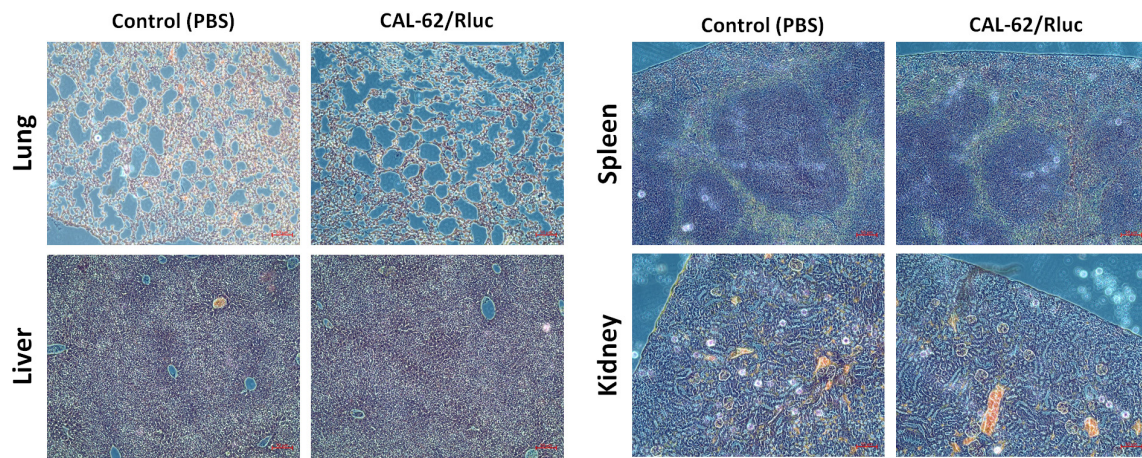

**Supplementary Figure 6: Microscopic examination of organs isolated from CAL-62/Rluc tumor bearing and Control (PBS) mice.** Lung, liver, splenic, and kidney tissues were stained with H&E. Scale bar: 50  $\mu$ m.
